# Supplementary material for: Predicting heterogeneous treatment effects of an Internet-based depression intervention for patients with chronic back pain: Secondary analysis of two randomized controlled trials
Source: PubMed Central journal article supplement (PMC10457531; doi:10.1016/j.invent.2023.100634), 2023-06-07
Supplement: mmc1.pdf [file mmc1.pdf]

---

**PREDICTING HETEROGENEOUS TREATMENT EFFECTS OF AN INTERNET-BASED  
DEPRESSION INTERVENTION FOR PATIENTS WITH CHRONIC BACK PAIN: SECONDARY  
ANALYSIS OF TWO RANDOMIZED CONTROLLED TRIALS**

Supplement

---

**Table of Contents**

|                                                                                                           |    |
|-----------------------------------------------------------------------------------------------------------|----|
| <b>S1.</b> Missingness patterns .....                                                                     | 2  |
| <b>S2.</b> Predictors of missingness. ....                                                                | 2  |
| <b>S3.</b> Imputation predictor matrix. ....                                                              | 3  |
| <b>S4.</b> Model equations (univariate moderator analysis). ....                                          | 4  |
| <b>S5.</b> Risk of Bias summary. ....                                                                     | 5  |
| <b>S6.</b> Effects on reliable change. ....                                                               | 5  |
| <b>S7.</b> Regression coefficients of univariate moderator analyses (main model; complete cases only). .. | 5  |
| <b>S8.</b> Regression coefficients of univariate moderator analyses (OLS regression). ....                | 6  |
| <b>S9.</b> Regression coefficients of univariate moderator analyses (OLS regression; complete cases). ... | 7  |
| <b>S10.</b> Moderator-specific marginal means and change scores. ....                                     | 8  |
| <b>S11.</b> PHQ-9 symptom changes in baseline PHQ-9 percentile groups. ....                               | 12 |
| <b>S12.</b> Correlation matrix of moderator variables .....                                               | 13 |
| <b>S13.</b> Variable permutation importance (model-based random forest).....                              | 14 |
| <b>S14.</b> Variable importances (complete cases only).....                                               | 14 |
| <b>S15.</b> Model-based recursive partitioning (complete cases only; $n=382$ ).....                       | 14 |
| <b>S16.</b> Reliable change in terminal tree nodes.....                                                   | 15 |
| <b>S17.</b> Non-zero parameters of the linear mixed model with $\ell_1$ -estimation (glmLasso) .....      | 15 |

### S1. Missingness patterns.

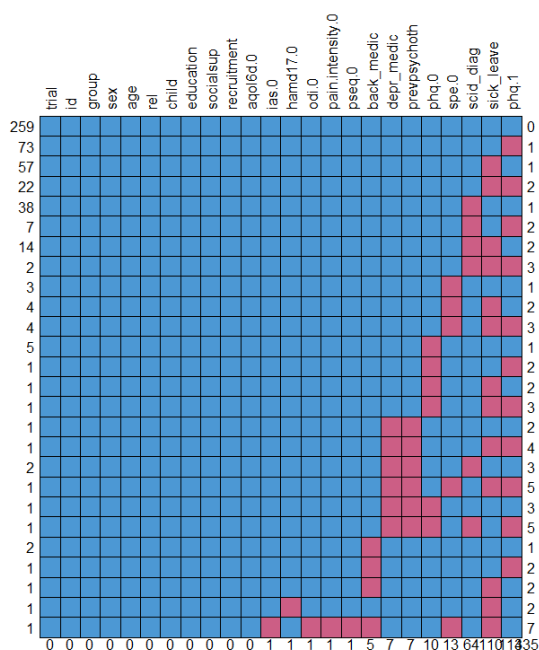

*Interpretation.* The most common missingness patterns (apart from complete data) are missing data in the outcome only, missing data in sick leave only and missing data in the SCID lifetime diagnosis for depression variable only.

### S2. Predictors of missingness.

| Baseline Variable                   | Prediction of missingness indicator |       |                                |        |           |                            |                        |     |
|-------------------------------------|-------------------------------------|-------|--------------------------------|--------|-----------|----------------------------|------------------------|-----|
|                                     | $\hat{\beta}$                       | OR    | $\sqrt{\hat{V}_{\hat{\beta}}}$ | Z      | $p(< t )$ | $\hat{\tau}_{Intercept}^2$ | $\hat{\tau}_{Slope}^2$ | n   |
| Group                               | 0.529                               | 1.697 | 0.231                          | 2.291  | 0.022     | 0.006                      | 0.012                  | 504 |
| <b>Socio-demographics</b>           |                                     |       |                                |        |           |                            |                        |     |
| Age                                 | 0.004                               | 1.004 | 0.013                          | 0.331  | 0.741     | 0.010                      | 0.000                  | 504 |
| Gender, female                      | 0.186                               | 1.204 | 0.226                          | 0.821  | 0.412     | 0.007                      | 0.008                  | 504 |
| Relationship, yes                   | 0.019                               | 1.019 | 0.248                          | 0.075  | 0.940     | 0.007                      | 0.008                  | 504 |
| Education, >13 years                | -0.033                              | 0.968 | 0.335                          | -0.098 | 0.922     | 0.006                      | 0.009                  | 504 |
| Children, yes                       | -0.132                              | 0.876 | 0.267                          | -0.495 | 0.620     | 0.007                      | 0.007                  | 504 |
| Lifetime SCID diagnosis, yes        | -0.042                              | 0.959 | 0.269                          | -0.155 | 0.877     | 0.006                      | 0.008                  | 440 |
| Previous psychotherapy, yes         | 0.128                               | 1.137 | 0.233                          | 0.550  | 0.582     | 0.008                      | 0.008                  | 497 |
| Previous depression medication, yes | -0.310                              | 0.733 | 0.257                          | -1.208 | 0.227     | 0.006                      | 0.009                  | 497 |
| Previous back pain medication, yes  | 0.276                               | 1.318 | 0.238                          | 1.159  | 0.246     | 0.008                      | 0.008                  | 499 |
| Sick leave, yes                     | -0.152                              | 0.859 | 0.265                          | -0.571 | 0.568     | 0.008                      | 0.008                  | 394 |
| Social support, (very) good         | -0.238                              | 0.789 | 0.232                          | -1.025 | 0.305     | 0.007                      | 0.008                  | 504 |
| Internet affinity (IAS)             | 0.004                               | 1.004 | 0.030                          | 0.122  | 0.903     | 0.010                      | 0.000                  | 503 |
| Recruitment, online                 | -0.371                              | 0.690 | 0.255                          | -1.452 | 0.146     | 0.006                      | 0.009                  | 504 |

**Symptom severity**

|                                        |        |       |       |        |       |       |       |     |
|----------------------------------------|--------|-------|-------|--------|-------|-------|-------|-----|
| Depressive symptom severity (PHQ-9)    | -0.006 | 0.994 | 0.028 | -0.208 | 0.835 | 0.009 | 0.000 | 494 |
| Depressive symptom severity (HAM-D-17) | 0.015  | 1.015 | 0.025 | 0.585  | 0.559 | 0.009 | 0.000 | 503 |
| Pain intensity (NRS)                   | -0.132 | 0.876 | 0.160 | -0.827 | 0.408 | 0.008 | 0.004 | 503 |
| Quality of life (AQoL-6D)              | -0.002 | 0.998 | 0.013 | -0.117 | 0.907 | 0.010 | 0.000 | 504 |

**Pain-related risk factors**

|                                      |        |       |       |        |       |       |       |     |
|--------------------------------------|--------|-------|-------|--------|-------|-------|-------|-----|
| Pain self-efficacy (PSEQ)            | -0.004 | 0.996 | 0.010 | -0.424 | 0.672 | 0.009 | 0.000 | 503 |
| Subjective employment forecast (SPE) | -0.017 | 0.983 | 0.109 | -0.159 | 0.874 | 0.007 | 0.004 | 491 |
| Pain-related disability (ODI)        | -0.003 | 0.997 | 0.009 | -0.307 | 0.759 | 0.010 | 0.000 | 503 |

*Note.* Multilevel logistic regression results with the missingness indicator (1= missing, 0= not missing) of the primary outcome (PHQ-9 at post-assessment) as dependent variable, based on the unimputed dataset

**S3. Imputation predictor matrix.**

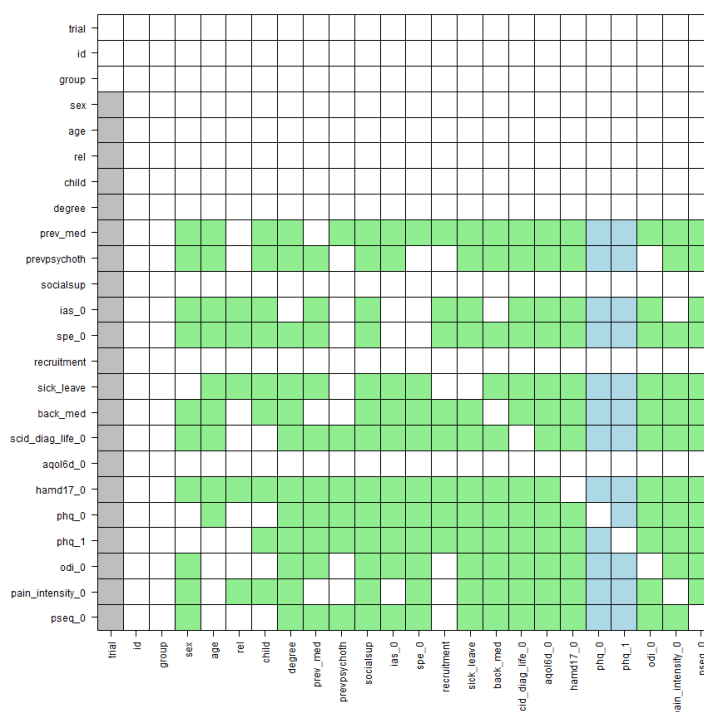

*Note.* Variables in the rows are predicted by variables in the columns. Missing values were generated using “by group”-imputation using multilevel models with trial as the cluster variable. Depressive symptom severity (PHQ-9) at baseline and post-assessment was modeled as both a fixed and random effect (blue); variables shown in green were modeled as simple linear predictors. A minimal correlation of  $r=0.05$  was required for a variable to be included as a predictor.

#### S4. Model equations (univariate moderator analysis).

##### Main Model (Linear Mixed-Effects Model)

The following formula was used in the main model to test treatment-covariate interactions:

$$y_{ik} = \alpha + \delta T_{ik} + \beta x_{ik} + \gamma x_{ik} T_{ik} + u_{\alpha,k} + u_{\delta,k} T_{ik} + \varepsilon_{ik}$$

$$\begin{bmatrix} u_{\alpha,k} \\ u_{\delta,k} \end{bmatrix} \sim \mathcal{N}(\mathbf{0}, \mathbf{D}) \quad \mathbf{D} = \begin{bmatrix} \tau_{u\alpha}^2 & \rho \tau_{u\alpha} \tau_{u\delta} \\ \rho \tau_{u\alpha} \tau_{u\delta} & \tau_{u\delta}^2 \end{bmatrix}$$

Where:

- $y_{ik}$  is the PHQ-9 post-test score of individual  $i$  in trial  $k$ ;
- $\alpha$  is the fixed intercept;
- $u_{\alpha,k}$  is the random intercept of trial  $k$ , capturing the between-study random effects variance  $\tau_{u\alpha}^2$ ;
- $T_{ik}$  is the treatment assignment of individual  $i$  in trial  $k$  (0 = control, 1 = intervention), and  $\delta$  the “overall” treatment effect;
- $u_{\delta,k}$  is the random group slope of trial  $k$ , capturing the heterogeneity variance of treatment effects across trials  $\tau_{u\delta}^2$ ;
- $x_{ik}$  is the value of individual  $i$  in trial  $k$  on the tested baseline covariate  $x$ , with  $\beta$  being the associated regression weight;
- $\gamma$  captures the treatment-covariate interaction (i.e., moderation) of  $\delta$  for varying values of  $x$ ;
- $\varepsilon_{ik}$  is the prediction error of individual  $i$  in trial  $k$ .

Given the low number of clusters, models were fitted using a maximum a posteriori estimation in a Bayesian setting as implemented in the *blme* package in R. For the random effects variance-covariance matrix  $\mathbf{D}$ , we set a Wishart prior with  $\nu=4$  and an identity matrix multiplied by 0.05 on the scale parameter.

##### OLS Regression Model (Sensitivity Analysis)

To test treatment-covariate interactions using a model without random effects, the following formula was used:

$$y_{ik} = \alpha_k + \delta T_{ik} + \beta x_{ik} + \gamma x_{ik} T_{ik} + \varepsilon_{ik}$$

Where:

- $y_{ik}$  is the PHQ-9 post-test score of individual  $i$  in trial  $k$ ;
- $\alpha_k$  is the trial-specific (“stratified”) intercept;
- $T_{ik}$  is the treatment assignment of individual  $i$  in trial  $k$  (0 = control, 1 = intervention), and  $\delta$  the average treatment effect;
- $x_{ik}$  is the value of individual  $i$  in trial  $k$  on the tested baseline covariate  $x$ , with  $\beta$  being the associated regression weight;
- $\gamma$  captures the treatment-covariate interaction (i.e., moderation) of  $\delta$  for varying values of  $x$ ;
- $\varepsilon_{ik}$  is the prediction error of individual  $i$  in trial  $k$ .

The model was fitted using OLS regression (`lm` function in R). To guard against misspecification and account for the nested data structure (patients in trials), cluster-robust variance estimation was employed for  $P$ -values and confidence intervals, using the CR2 estimator by Pustejovsky & Tipton (2018).

**References**

Chung Y, Rabe-Hesketh S, Dorie V, Gelman A, Liu J (2013). "A nondegenerate penalized likelihood estimator for variance parameters in multilevel models." *Psychometrika* 78 (4), 685-709. DOI: 10.1007/s11336-013-9328-2.

Pustejovsky, J. E., & Tipton, E. (2018). Small-sample methods for cluster-robust variance estimation and hypothesis testing in fixed effects models. *Journal of Business & Economic Statistics*, 36(4), 672-683.

**S5. Risk of Bias summary.**

|       |                          | Risk of bias domains |    |    |    |    |         |
|-------|--------------------------|----------------------|----|----|----|----|---------|
|       |                          | D1                   | D2 | D3 | D4 | D5 | Overall |
| Study | Baumeister et al. (2021) | +                    | -  | +  | +  | +  | -       |
|       | Sander et al. (2020)     | +                    | -  | +  | +  | +  | -       |

Domains:  
 D1: Bias arising from the randomization process.  
 D2: Bias due to deviations from intended intervention.  
 D3: Bias due to missing outcome data.  
 D4: Bias in measurement of the outcome.  
 D5: Bias in selection of the reported result.

Judgement  
 - Some concerns  
 + Low

**S6. Effects on reliable change.**

| RCI | Control (n= 251) |           |          | Intervention (n= 253) |           |          |
|-----|------------------|-----------|----------|-----------------------|-----------|----------|
|     | Deteriorated     | Unchanged | Improved | Deteriorated          | Unchanged | Improved |
| n   | 14               | 209       | 28       | 5                     | 186       | 62       |
| %   | 5.58%            | 83.27%    | 11.16%   | 1.98%                 | 73.52%    | 24.52%   |

Note. Based on the imputed data. RCI values were determined using the standard deviation of the baseline PHQ-9 value and assuming a reliability of  $r_{yy}=0.84$  (Kroenke et al., 2001). The  $\chi^2$  test showed that significantly more participants of the intervention group experienced a reliable improvement compared to the control group:  $F_{1,1515.47} = 12.36, p < .001$ .

**References:**

Kroenke, K., Spitzer, R. L., & Williams, J. B. (2001). The PHQ-9: validity of a brief depression severity measure. *Journal of General Internal Medicine*, 16(9), 606-613.

**S7. Regression coefficients of univariate moderator analyses (main model; complete cases only).**

| Baseline Variable         | $\hat{\beta}$ | $\sqrt{\hat{V}_{\hat{\beta}}}$ | t      | p(< t ) | $\hat{\tau}_{Intercept}^2$ | $\hat{\tau}_{Slope}^2$ |
|---------------------------|---------------|--------------------------------|--------|---------|----------------------------|------------------------|
| <b>Socio-demographics</b> |               |                                |        |         |                            |                        |
| Age                       | 0.010         | 0.477                          | 0.022  | 0.983   | 1.471                      | 0.719                  |
| Gender, female            | -1.329        | 0.939                          | -1.416 | 0.158   | 1.476                      | 0.716                  |
| Relationship, yes         | -1.328        | 0.938                          | -1.616 | 0.158   | 1.472                      | 0.722                  |

Predicting Effects of An Internet-based Depression Intervention for Patients with Chronic Back Pain

|                                        |        |       |        |       |       |       |
|----------------------------------------|--------|-------|--------|-------|-------|-------|
| Education, >13 years                   | -0.659 | 0.954 | -0.690 | 0.490 | 1.450 | 0.733 |
| Children, yes                          | -0.887 | 0.939 | -0.944 | 0.346 | 1.464 | 0.713 |
| Lifetime SCID diagnosis, yes           | -0.380 | 1.453 | -0.262 | 0.794 | 0.941 | 0.920 |
| Previous psychotherapy, yes            | 0.180  | 0.939 | 0.192  | 0.848 | 1.372 | 0.701 |
| Previous depression medication, yes    | 0.716  | 0.937 | 0.765  | 0.445 | 1.412 | 0.717 |
| Previous back pain medication, yes     | -1.981 | 0.934 | -2.121 | 0.035 | 1.467 | 0.707 |
| Sick leave, yes                        | -1.143 | 0.994 | -1.150 | 0.251 | 1.314 | 0.691 |
| Social support, (very) good            | 1.891  | 0.935 | 0.953  | 0.341 | 1.444 | 0.717 |
| Internet affinity (IAS)                | -0.022 | 0.473 | -0.047 | 0.963 | 1.450 | 0.718 |
| Recruitment, online                    | 1.523  | 0.941 | 1.618  | 0.106 | 1.503 | 0.734 |
| <b>Symptom severity</b>                |        |       |        |       |       |       |
| Depressive symptom severity (PHQ-9)    | -0.771 | 0.395 | -1.951 | 0.052 | 0.626 | 0.564 |
| Depressive symptom severity (HAM-D-17) | -0.580 | 0.481 | -1.205 | 0.229 | 0.597 | 0.686 |
| Pain intensity (NRS)                   | -0.379 | 0.465 | -0.817 | 0.414 | 1.396 | 0.720 |
| Quality of life (AQoL-6D)              | -0.436 | 0.431 | -1.012 | 0.312 | 0.641 | 0.647 |
| <b>Pain-related risk factors</b>       |        |       |        |       |       |       |
| Pain self-efficacy (PSEQ)              | 0.204  | 0.457 | 0.446  | 0.656 | 1.180 | 0.827 |
| Subjective employment forecast (SPE)   | -0.570 | 0.470 | 1.211  | 0.227 | 1.379 | 0.720 |
| Pain-related disability (ODI)          | -0.220 | 0.453 | -0.486 | 0.627 | 1.220 | 0.729 |

*Note.* A Wishart prior was used for the covariance-variance matrix of the random effects. AQoL-6D: Assessment of Quality of Life, HAM-D-17: Hamilton Depression Rating Scale, IAS: Internet Affinity Scale; NRS: numerical rating scale, ODI: Oswestry Disability Scale, PHQ-9: Patient Health Questionnaire, PSEQ: Pain self-efficacy questionnaire, SPE: Subjective Prognostic Employment Scale.

**S8.** Regression coefficients of univariate moderator analyses (OLS regression).

| Baseline Variable         | Treatment-Covariate Interaction |                          |        |           |
|---------------------------|---------------------------------|--------------------------|--------|-----------|
|                           | $\hat{\beta}$                   | $\sqrt{\hat{V}_{\beta}}$ | $t$    | $p(< t )$ |
| <b>Socio-demographics</b> |                                 |                          |        |           |
| Age                       | 0.119                           | 0.452                    | 0.263  | 0.792     |
| Gender, female            | -0.688                          | 0.919                    | -0.749 | 0.453     |
| Relationship, yes         | -0.831                          | 0.879                    | -0.945 | 0.343     |
| Education, >13 years      | -0.354                          | 0.910                    | -0.389 | 0.696     |

|                                     |        |       |        |       |
|-------------------------------------|--------|-------|--------|-------|
| Children, yes                       | -0.687 | 0.894 | -0.768 | 0.441 |
| Lifetime SCID diagnosis, yes        | -1.067 | 0.906 | -1.178 | 0.238 |
| Previous psychotherapy, yes         | -0.179 | 0.917 | -0.195 | 0.844 |
| Previous depression medication, yes | 0.303  | 0.920 | 0.329  | 0.741 |
| Previous back pain medication, yes  | -2.020 | 0.892 | -2.265 | 0.024 |
| Sick leave, yes                     | -1.422 | 1.012 | -1.405 | 0.159 |
| Social support, (very) good         | 1.107  | 0.891 | 1.242  | 0.214 |
| Internet affinity (IAS)             | -0.025 | 0.466 | -0.054 | 0.956 |
| Recruitment, online                 | 0.904  | 0.886 | 1.020  | 0.307 |

**Symptom severity**

|                                        |        |       |        |       |
|----------------------------------------|--------|-------|--------|-------|
| Depressive symptom severity (PHQ-9)    | -0.799 | 0.377 | -2.119 | 0.035 |
| Depressive symptom severity (HAM-D-17) | -0.816 | 0.424 | -1.924 | 0.054 |
| Pain intensity (NRS)                   | -0.510 | 0.442 | -1.069 | 0.248 |
| Quality of life (AQoL-6D)              | -0.636 | 0.398 | -1.598 | 0.112 |

**Pain-related risk factors**

|                                      |        |       |        |       |
|--------------------------------------|--------|-------|--------|-------|
| Pain self-efficacy (PSEQ)            | 0.357  | 0.423 | 0.844  | 0.398 |
| Subjective employment forecast (SPE) | -0.385 | 0.447 | -0.861 | 0.388 |
| Pain-related disability (ODI)        | -0.409 | 0.421 | -0.971 | 0.330 |

---

*Note.* *P*-values based on cluster-robust variance estimation (CR2 estimator). AQoL-6D: Assessment of Quality of Life, HAM-D-17: Hamilton Depression Rating Scale, IAS: Internet Affinity Scale; NRS: numerical rating scale, ODI: Oswestry Disability Scale, PHQ-9: Patient Health Questionnaire, PSEQ: Pain self-efficacy questionnaire, SPE: Subjective Prognostic Employment Scale.

**S9. Regression coefficients of univariate moderator analyses (OLS regression; complete cases).**

| Baseline Variable            | Treatment-Covariate Interaction |                          |          |                          |
|------------------------------|---------------------------------|--------------------------|----------|--------------------------|
|                              | $\hat{\beta}$                   | $\sqrt{\hat{V}_{\beta}}$ | <i>t</i> | <i>p</i> (<  <i>t</i>  ) |
| <b>Socio-demographics</b>    |                                 |                          |          |                          |
| Age                          | 0.008                           | 0.475                    | 0.016    | 0.987                    |
| Gender, female               | -1.333                          | 0.938                    | -2.029   | 0.156                    |
| Relationship, yes            | -1.304                          | 0.936                    | -1.392   | 0.165                    |
| Education, >13 years         | -0.556                          | 0.943                    | -0.589   | 0.556                    |
| Children, yes                | -0.882                          | 0.937                    | -0.941   | 0.347                    |
| Lifetime SCID diagnosis, yes | -0.558                          | 0.989                    | -0.565   | 0.573                    |

Predicting Effects of An Internet-based Depression Intervention for Patients with Chronic Back Pain

|                                     |        |       |        |       |
|-------------------------------------|--------|-------|--------|-------|
| Previous psychotherapy, yes         | 0.141  | 0.927 | 0.152  | 0.880 |
| Previous depression medication, yes | 0.618  | 0.926 | 0.667  | 0.505 |
| Previous back pain medication, yes  | -2.000 | 0.933 | -2.143 | 0.033 |
| Sick leave, yes                     | -1.148 | 0.989 | -1.160 | 0.246 |
| Social support, (very) good         | 0.958  | 0.931 | 1.029  | 0.304 |
| Internet affinity (IAS)             | -0.041 | 0.470 | -0.087 | 0.931 |
| Recruitment, online                 | 1.447  | 0.936 | 1.546  | 0.123 |

**Symptom severity**

|                                        |        |       |        |       |
|----------------------------------------|--------|-------|--------|-------|
| Depressive symptom severity (PHQ-9)    | -0.765 | 0.365 | -2.095 | 0.037 |
| Depressive symptom severity (HAM-D-17) | -0.610 | 0.432 | -1.412 | 0.159 |
| Pain intensity (NRS)                   | -0.431 | 0.461 | -0.934 | 0.351 |
| Quality of life (AQoL-6D)              | -0.502 | 0.405 | -1.240 | 0.216 |

**Pain-related risk factors**

|                                      |        |       |        |       |
|--------------------------------------|--------|-------|--------|-------|
| Pain self-efficacy (PSEQ)            | 0.404  | 0.443 | 0.912  | 0.363 |
| Subjective employment forecast (SPE) | -0.612 | 0.467 | -1.319 | 0.188 |
| Pain-related disability (ODI)        | -0.320 | 0.444 | -0.722 | 0.471 |

*Note.* AQoL-6D: Assessment of Quality of Life, HAM-D-17: Hamilton Depression Rating Scale, IAS: Internet Affinity Scale; NRS: numerical rating scale, ODI: Oswestry Disability Scale, PHQ-9: Patient Health Questionnaire, PSEQ: Pain self-efficacy questionnaire, SPE: Subjective Prognostic Employment Scale.

**S10. Moderator-specific marginal means and change scores.**

|                                      |              | PHQ-9 Score         |                      |                   |                     | Test of Moderation<br>(Change Score Analysis) |            |
|--------------------------------------|--------------|---------------------|----------------------|-------------------|---------------------|-----------------------------------------------|------------|
|                                      |              | Baseline<br>(M, SE) | Post-Test<br>(M, SE) | Change<br>(M, SE) | Δ Change<br>(M, SE) | Diff. Δ Change<br>(M, SE)                     | F/t p      |
| <b>Age, Percentiles</b>              |              |                     |                      |                   |                     |                                               |            |
| < 20 <sup>th</sup>                   | Control      | 10.53 (0.570)       | 9.69 (0.710)         | -0.84 (0.592)     |                     |                                               | 0.45 0.772 |
|                                      | Intervention | 10.96 (0.508)       | 7.47 (0.653)         | -3.49 (0.550)     | -2.65 (0.825)       | Ref.                                          |            |
| < 40 <sup>th</sup>                   | Control      | 10.49 (0.566)       | 9.53 (0.717)         | -0.96 (0.600)     |                     |                                               |            |
|                                      | Intervention | 10.61 (0.498)       | 7.58 (0.622)         | -3.03 (0.524)     | -2.06 (0.799)       | -0.59 (1.130), <i>n.s.</i>                    |            |
| 40 <sup>th</sup> to 60 <sup>th</sup> | Control      | 10.89 (0.537)       | 9.62 (0.680)         | -1.27 (0.579)     |                     |                                               |            |
|                                      | Intervention | 10.19 (0.575)       | 7.64 (0.765)         | -2.55 (0.655)     | -1.28 (0.881)       | -1.37 (1.182), <i>n.s.</i>                    |            |
| > 60 <sup>th</sup>                   | Control      | 10.79 (0.545)       | 10.07 (0.726)        | -0.72 (0.627)     |                     |                                               |            |
|                                      | Intervention | 9.92 (0.635)        | 6.97 (0.818)         | -2.95 (0.689)     | -2.23 (0.924)       | -0.42 (1.216), <i>n.s.</i>                    |            |
| > 80 <sup>th</sup>                   | Control      | 10.02 (0.571)       | 8.97 (0.706)         | -1.04 (0.596)     |                     |                                               |            |



## Predicting Effects of An Internet-based Depression Intervention for Patients with Chronic Back Pain

|                                       |              | PHQ-9 Score         |                      |                   |                     |                            | Test of Moderation<br>(Change Score Analysis) |       |
|---------------------------------------|--------------|---------------------|----------------------|-------------------|---------------------|----------------------------|-----------------------------------------------|-------|
|                                       |              | Baseline<br>(M, SE) | Post-Test<br>(M, SE) | Change<br>(M, SE) | Δ Change<br>(M, SE) | Diff. Δ Change<br>(M, SE)  | F/t                                           | p     |
|                                       | Intervention | 9.90 (0.576)        | 7.39 (0.766)         | -2.50 (0.654)     | -1.46 (0.865)       | -1.19 (1.171), <i>n.s.</i> |                                               |       |
| <b>Gender</b>                         |              |                     |                      |                   |                     |                            |                                               |       |
| Female                                | Control      | 10.63 (0.312)       | 9.46 (0.393)         | -1.17 (0.336)     |                     |                            | 0.10                                          | 0.748 |
|                                       | Intervention | 10.65 (0.321)       | 7.60 (0.413)         | -3.05 (0.349)     | -1.89 (0.495)       | Ref.                       |                                               |       |
| Male                                  | Control      | 10.44 (0.410)       | 9.80 (0.525)         | -0.64 (0.444)     |                     |                            |                                               |       |
|                                       | Intervention | 10.01 (0.385)       | 7.23 (0.534)         | -2.78 (0.465)     | -2.15 (0.660)       | -0.26 (0.809), <i>n.s.</i> |                                               |       |
| <b>Relationship</b>                   |              |                     |                      |                   |                     |                            |                                               |       |
| No                                    | Control      | 10.89 (0.480)       | 9.76 (0.613)         | -1.13 (0.515)     |                     |                            | 0.02                                          | 0.898 |
|                                       | Intervention | 11.29 (0.455)       | 8.28 (0.590)         | -3.02 (0.500)     | -1.89 (0.720)       | Ref.                       |                                               |       |
| Yes                                   | Control      | 10.44 (0.289)       | 9.52 (0.368)         | -0.92 (0.315)     |                     |                            |                                               |       |
|                                       | Intervention | 10.01 (0.292)       | 7.11 (0.387)         | -2.91 (0.332)     | -1.99 (0.461)       | -0.10 (0.816), <i>n.s.</i> |                                               |       |
| <b>Education</b>                      |              |                     |                      |                   |                     |                            |                                               |       |
| ≤ 13 years                            | Control      | 10.52 (0.265)       | 9.52 (0.340)         | -1.00 (0.291)     |                     |                            | 0.20                                          | 0.651 |
|                                       | Intervention | 10.48 (0.263)       | 7.44 (0.350)         | -3.04 (0.301)     | -2.03 (0.427)       | Ref.                       |                                               |       |
| > 13 years                            | Control      | 10.82 (0.712)       | 10.11 (0.880)        | -0.72 (0.733)     |                     |                            |                                               |       |
|                                       | Intervention | 9.73 (0.699)        | 7.50 (0.973)         | -2.23 (0.843)     | -1.51 (1.091)       | 0.52 (1.150), <i>n.s.</i>  |                                               |       |
| <b>Children</b>                       |              |                     |                      |                   |                     |                            |                                               |       |
| No                                    | Control      | 10.34 (0.562)       | 8.98 (0.733)         | -1.36 (0.622)     |                     |                            | 0.90                                          | 0.344 |
|                                       | Intervention | 10.14 (0.539)       | 7.53 (0.693)         | -2.61 (0.586)     | -1.26 (0.860)       | Ref.                       |                                               |       |
| Yes                                   | Control      | 10.61 (0.277)       | 9.73 (0.356)         | -0.88 (0.304)     |                     |                            |                                               |       |
|                                       | Intervention | 10.45 (0.278)       | 7.42 (0.377)         | -3.03 (0.326)     | -2.15 (0.445)       | -0.89 (0.942), <i>n.s.</i> |                                               |       |
| <b>Lifetime SCID diagnosis</b>        |              |                     |                      |                   |                     |                            |                                               |       |
| No                                    | Control      | 9.66 (0.711)        | 8.72 (0.895)         | -0.94 (0.753)     |                     |                            | 1.11                                          | 0.293 |
|                                       | Intervention | 9.61 (0.709)        | 7.05 (0.923)         | -2.56 (0.786)     | -1.62 (0.525)       | Ref.                       |                                               |       |
| Yes                                   | Control      | 11.42 (0.683)       | 10.48 (0.872)        | -0.94 (0.735)     |                     |                            |                                               |       |
|                                       | Intervention | 11.10 (0.683)       | 7.73 (0.866)         | -3.36 (0.727)     | -2.42 (0.593)       | -0.81 (0.768), <i>n.s.</i> |                                               |       |
| <b>Previous psychotherapy</b>         |              |                     |                      |                   |                     |                            |                                               |       |
| No                                    | Control      | 10.06 (0.316)       | 9.37 (0.416)         | -0.68 (0.357)     |                     |                            | 0.32                                          | 0.574 |
|                                       | Intervention | 9.80 (0.309)        | 7.31 (0.416)         | -2.49 (0.354)     | -1.81 (0.505)       | Ref.                       |                                               |       |
| Yes                                   | Control      | 11.33 (0.401)       | 9.92 (0.518)         | -1.42 (0.447)     |                     |                            |                                               |       |
|                                       | Intervention | 11.35 (0.403)       | 7.66 (0.561)         | -3.68 (0.486)     | -2.27 (0.651)       | -0.46 (0.816), <i>n.s.</i> |                                               |       |
| <b>Previous depression medication</b> |              |                     |                      |                   |                     |                            |                                               |       |
| No                                    | Control      | 10.33 (0.296)       | 9.48 (0.392)         | -0.85 (0.336)     |                     |                            | 0.00                                          | 0.985 |
|                                       | Intervention | 10.05 (0.298)       | 7.24 (0.398)         | -2.81 (0.342)     | -1.97 (0.472)       | Ref.                       |                                               |       |
| Yes                                   | Control      | 11.08 (0.465)       | 9.81 (0.604)         | -1.27 (0.512)     |                     |                            |                                               |       |
|                                       | Intervention | 11.12 (0.447)       | 7.90 (0.606)         | -3.22 (0.523)     | 1.95 (0.731)        | 0.02 (0.853), <i>n.s.</i>  |                                               |       |

## Predicting Effects of An Internet-based Depression Intervention for Patients with Chronic Back Pain

|                                                         |              | PHQ-9 Score         |                      |                   |                     |                            | Test of Moderation<br>(Change Score Analysis) |       |
|---------------------------------------------------------|--------------|---------------------|----------------------|-------------------|---------------------|----------------------------|-----------------------------------------------|-------|
|                                                         |              | Baseline<br>(M, SE) | Post-Test<br>(M, SE) | Change<br>(M, SE) | Δ Change<br>(M, SE) | Diff. Δ Change<br>(M, SE)  | F/t                                           | p     |
| <b>Previous back pain medication</b>                    |              |                     |                      |                   |                     |                            |                                               |       |
| No                                                      | Control      | 9.46 (0.405)        | 7.91 (0.501)         | -1.55 (0.426)     |                     |                            | 6.606                                         | 0.010 |
|                                                         | Intervention | 9.32 (0.412)        | 7.11 (0.544)         | -2.21 (0.467)     | -0.65 (0.644)       | Ref.                       |                                               |       |
| Yes                                                     | Control      | 11.18 (0.305)       | 10.53 (0.393)        | -0.64 (0.340)     |                     |                            |                                               |       |
|                                                         | Intervention | 10.97 (0.302)       | 7.63 (0.413)         | -3.24 (0.361)     | -2.70 (0.500)       | -2.05 (0.797)*             |                                               |       |
| <b>Sick leave</b>                                       |              |                     |                      |                   |                     |                            |                                               |       |
| No                                                      | Control      | 9.18 (0.458)        | 8.17 (0.600)         | -1.01 (0.512)     |                     |                            | 0.01                                          | 0.935 |
|                                                         | Intervention | 10.06 (0.464)       | 7.03 (0.609)         | -3.02 (0.522)     | -2.01 (0.730)       | Ref.                       |                                               |       |
| Yes                                                     | Control      | 11.23 (0.307)       | 10.27 (0.399)        | -0.96 (0.336)     |                     |                            |                                               |       |
|                                                         | Intervention | 10.53 (0.309)       | 7.63 (0.413)         | -2.90 (0.355)     | -1.94 (0.503)       | 0.07 (0.906), <i>n.s.</i>  |                                               |       |
| <b>Social support</b>                                   |              |                     |                      |                   |                     |                            |                                               |       |
| < good                                                  | Control      | 11.30 (0.316)       | 10.29 (0.409)        | -1.01 (0.351)     |                     |                            | 0.51                                          | 0.474 |
|                                                         | Intervention | 10.86 (0.306)       | 7.67 (0.423)         | -3.19 (0.368)     | -2.18 (0.524)       | Ref.                       |                                               |       |
| ≥ good                                                  | Control      | 9.44 (0.381)        | 8.54 (0.493)         | -0.90 (0.419)     |                     |                            |                                               |       |
|                                                         | Intervention | 9.58 (0.395)        | 7.05 (0.504)         | -2.52 (0.427)     | -1.62 (0.597)       | 0.56 (0.775), <i>n.s.</i>  |                                               |       |
| <b>Internet affinity (IAS), Percentiles</b>             |              |                     |                      |                   |                     |                            |                                               |       |
| < 20 <sup>th</sup>                                      | Control      | 10.42 (0.521)       | 8.86 (0.660)         | -1.56 (0.567)     |                     |                            | 0.24                                          | 0.915 |
|                                                         | Intervention | 9.77 (0.562)        | 6.65 (0.685)         | -3.12 (0.568)     | -1.57 (0.803)       | Ref.                       |                                               |       |
| < 40 <sup>th</sup>                                      | Control      | 11.42 (0.553)       | 10.44 (0.680)        | -0.98 (0.571)     |                     |                            |                                               |       |
|                                                         | Intervention | 10.54 (0.520)       | 7.98 (0.666)         | -2.55 (0.563)     | -1.57 (0.809)       | -0.01 (1.133), <i>n.s.</i> |                                               |       |
| 40 <sup>th</sup> to 60 <sup>th</sup>                    | Control      | 10.20 (0.555)       | 9.52 (0.702)         | -0.68 (0.597)     |                     |                            |                                               |       |
|                                                         | Intervention | 10.77 (0.602)       | 7.77 (0.785)         | -2.99 (0.668)     | -2.31 (0.896)       | -0.75 (1.190), <i>n.s.</i> |                                               |       |
| > 60 <sup>th</sup>                                      | Control      | 9.73 (0.544)        | 8.77 (0.701)         | -0.96 (0.598)     |                     |                            |                                               |       |
|                                                         | Intervention | 10.14 (0.520)       | 7.02 (0.670)         | -3.12 (0.573)     | -2.16 (0.841)       | -0.60 (1.126), <i>n.s.</i> |                                               |       |
| > 80 <sup>th</sup>                                      | Control      | 11.17 (0.607)       | 10.62 (0.764)        | -0.55 (0.643)     |                     |                            |                                               |       |
|                                                         | Intervention | 10.75 (0.558)       | 7.77 (0.743)         | -2.98 (0.653)     | -2.43 (0.906)       | -0.87 (1.237), <i>n.s.</i> |                                               |       |
| <b>Recruitment</b>                                      |              |                     |                      |                   |                     |                            |                                               |       |
| Offline                                                 | Control      | 10.67 (0.300)       | 9.88 (0.380)         | -0.80 (0.323)     |                     |                            | 0.01                                          | 0.921 |
|                                                         | Intervention | 10.24 (0.294)       | 7.44 (0.402)         | -2.80 (0.350)     | -2.00 (0.472)       | Ref.                       |                                               |       |
| Online                                                  | Control      | 10.29 (0.446)       | 8.93 (0.578)         | -1.36 (0.489)     |                     |                            |                                               |       |
|                                                         | Intervention | 10.76 (0.459)       | 7.48 (0.580)         | -3.28 (0.486)     | -1.92 (0.697)       | 0.08 (0.812), <i>n.s.</i>  |                                               |       |
| <b>Depressive symptom severity (PHQ-9), Percentiles</b> |              |                     |                      |                   |                     |                            |                                               |       |
| < 20 <sup>th</sup>                                      | Control      | 4.09 (0.211)        | 4.77 (0.625)         | 0.68 (0.601)      |                     |                            | 1.18                                          | 0.319 |
|                                                         | Intervention | 4.61 (0.201)        | 3.82 (0.635)         | -0.79 (0.61)      | -1.46 (0.805)       | Ref.                       |                                               |       |
| < 40 <sup>th</sup>                                      | Control      | 7.81 (0.311)        | 7.03 (0.626)         | -0.78 (0.556)     |                     |                            |                                               |       |
|                                                         | Intervention | 7.74 (0.294)        | 5.57 (0.609)         | -2.17 (0.525)     | -1.38 (0.761)       | 0.08 (1.084), <i>n.s.</i>  |                                               |       |
| 40 <sup>th</sup> to 60 <sup>th</sup>                    | Control      | 10.32 (0.321)       | 9.22 (0.610)         | -1.1 (0.554)      |                     |                            |                                               |       |
|                                                         | Intervention | 10.25 (0.315)       | 7.75 (0.684)         | -2.5 (0.681)      | -1.40 (0.861)       | 0.07 (1.158), <i>n.s.</i>  |                                               |       |
| > 60 <sup>th</sup>                                      | Control      | 12.47 (0.23)        | 11.38 (0.706)        | -1.09 (0.675)     |                     |                            |                                               |       |
|                                                         | Intervention | 12.38 (0.219)       | 8.41 (0.757)         | -3.97 (0.732)     | -2.88 (1.013)       | -1.41 (1.283), <i>n.s.</i> |                                               |       |
| > 80 <sup>th</sup>                                      | Control      | 17.02 (0.217)       | 14.92 (0.635)        | -2.1 (0.602)      |                     |                            |                                               |       |
|                                                         | Intervention | 16.63 (0.216)       | 11.26 (0.619)        | -5.37 (0.591)     | -3.26 (0.823)       | -1.80 (1.160), <i>n.s.</i> |                                               |       |

## Predicting Effects of An Internet-based Depression Intervention for Patients with Chronic Back Pain

|                                                            |              | PHQ-9 Score         |                      |                   |                     |                           | Test of Moderation<br>(Change Score Analysis) |       |
|------------------------------------------------------------|--------------|---------------------|----------------------|-------------------|---------------------|---------------------------|-----------------------------------------------|-------|
|                                                            |              | Baseline<br>(M, SE) | Post-Test<br>(M, SE) | Change<br>(M, SE) | Δ Change<br>(M, SE) | Diff. Δ Change<br>(M, SE) | F/t                                           | p     |
| <b>Depressive symptom severity (HAM-D-17), Percentiles</b> |              |                     |                      |                   |                     |                           |                                               |       |
| < 20 <sup>th</sup>                                         | Control      | 6.87 (0.510)        | 6.31 (0.671)         | -0.56 (0.608)     | .                   |                           | 0.48                                          | 0.747 |
|                                                            | Intervention | 6.98 (0.479)        | 4.69 (0.644)         | -2.29 (0.577)     | -1.73 (0.784)       | Ref.                      |                                               |       |
| < 40 <sup>th</sup>                                         | Control      | 9.37 (0.536)        | 7.82 (0.699)         | -1.55 (0.620)     |                     |                           | 0.22 (1.140), <i>n.s.</i>                     |       |
|                                                            | Intervention | 9.61 (0.486)        | 6.55 (0.670)         | -3.06 (0.609)     | -1.51 (0.850)       |                           |                                               |       |
| 40 <sup>th</sup> to 60 <sup>th</sup>                       | Control      | 10.14 (0.463)       | 8.78 (0.616)         | -1.36 (0.549)     |                     |                           | 0.05 (1.185), <i>n.s.</i>                     |       |
|                                                            | Intervention | 10.56 (0.547)       | 7.51 (0.744)         | -3.04 (0.680)     | -1.69 (0.865)       |                           |                                               |       |
| > 60 <sup>th</sup>                                         | Control      | 11.85 (0.475)       | 10.74 (0.632)        | -1.11 (0.568)     |                     |                           | -0.35 (1.115), <i>n.s.</i>                    |       |
|                                                            | Intervention | 11.57 (0.474)       | 8.36 (0.642)         | -3.2 (0.578)      | -2.09 (0.824)       |                           |                                               |       |
| > 80 <sup>th</sup>                                         | Control      | 14.08 (0.567)       | 13.91 (0.772)        | -0.16 (0.700)     |                     |                           | -1.33 (1.249), <i>n.s.</i>                    |       |
|                                                            | Intervention | 13.06 (0.544)       | 9.83 (0.840)         | -3.23 (0.775)     | -3.07 (0.986)       |                           |                                               |       |
| <b>Pain intensity (NRS)</b>                                |              |                     |                      |                   |                     |                           |                                               |       |
| Rated < 1                                                  | Control      | 7.51 (1.133)        | 6.25 (1.456)         | -1.26 (1.283)     | .                   |                           | 0.31                                          | 0.816 |
|                                                            | Intervention | 8.98 (1.204)        | 6.77 (1.768)         | -2.22 (1.578)     | -0.96 (1.999)       | Ref.                      |                                               |       |
| Rated < 2                                                  | Control      | 9.13 (0.425)        | 8.37 (0.545)         | -0.76 (0.471)     |                     |                           | -0.87 (0.861), <i>n.s.</i>                    |       |
|                                                            | Intervention | 9.14 (0.411)        | 6.55 (0.539)         | -2.59 (0.464)     | -1.83 (0.654)       |                           |                                               |       |
| Rated < 3                                                  | Control      | 11.11 (0.313)       | 9.97 (0.413)         | -1.13 (0.359)     |                     |                           | -1.00 (1.359), <i>n.s.</i>                    |       |
|                                                            | Intervention | 10.54 (0.322)       | 7.45 (0.458)         | -3.09 (0.408)     | -1.96 (0.559)       |                           |                                               |       |
| Rated < 4                                                  | Control      | 13.26 (0.800)       | 12.74 (1.006)        | -0.51 (0.869)     |                     |                           | -1.98 (1.302), <i>n.s.</i>                    |       |
|                                                            | Intervention | 13.50 (0.706)       | 10.05 (0.949)        | -3.45 (0.835)     | -2.94 (1.188)       |                           |                                               |       |
| <b>Quality of life (AQoL-6D), Percentiles</b>              |              |                     |                      |                   |                     |                           |                                               |       |
| < 20 <sup>th</sup>                                         | Control      | 6.25 (0.438)        | 5.43 (0.609)         | -0.81 (0.580)     |                     |                           | 0.78                                          | 0.537 |
|                                                            | Intervention | 6.84 (0.413)        | 4.35 (0.622)         | -2.49 (0.591)     | -1.67 (0.788)       | Ref.                      |                                               |       |
| < 40 <sup>th</sup>                                         | Control      | 9.55 (0.403)        | 8.35 (0.555)         | -1.19 (0.531)     |                     |                           | 0.17 (1.107), <i>n.s.</i>                     |       |
|                                                            | Intervention | 8.25 (0.474)        | 5.55 (0.667)         | -2.70 (0.628)     | -1.51 (0.814)       |                           |                                               |       |
| 40 <sup>th</sup> to 60 <sup>th</sup>                       | Control      | 10.44 (0.487)       | 9.74 (0.717)         | -0.70 (0.679)     |                     |                           | -0.05 (1.148), <i>n.s.</i>                    |       |
|                                                            | Intervention | 10.14 (0.430)       | 7.72 (0.616)         | -2.42 (0.583)     | -1.72 (0.908)       |                           |                                               |       |
| > 60 <sup>th</sup>                                         | Control      | 12.05 (0.446)       | 10.31 (0.634)        | -1.73 (0.598)     |                     |                           | -0.17 (1.198), <i>n.s.</i>                    |       |
|                                                            | Intervention | 11.51 (0.478)       | 7.93 (0.718)         | -3.57 (0.692)     | -1.84 (0.922)       |                           |                                               |       |
| > 80 <sup>th</sup>                                         | Control      | 14.40 (0.460)       | 14.15 (0.658)        | -0.24 (0.620)     |                     |                           | -1.64 (1.169), <i>n.s.</i>                    |       |
|                                                            | Intervention | 14.33 (0.424)       | 10.77 (0.641)        | -3.56 (0.610)     | -3.32 (0.853)       |                           |                                               |       |
| <b>Pain self-efficacy (PSEQ), Percentiles</b>              |              |                     |                      |                   |                     |                           |                                               |       |
| < 20 <sup>th</sup>                                         | Control      | 12.58 (0.537)       | 12.17 (0.703)        | -0.41 (0.622)     |                     |                           | 0.98                                          | 0.415 |
|                                                            | Intervention | 12.84 (0.497)       | 9.81 (0.644)         | -3.03 (0.569)     | -2.61 (0.855)       | Ref.                      |                                               |       |
| < 40 <sup>th</sup>                                         | Control      | 11.24 (0.491)       | 10.74 (0.631)        | -0.50 (0.560)     |                     |                           | -0.25 (1.185), <i>n.s.</i>                    |       |
|                                                            | Intervention | 11.20 (0.520)       | 7.83 (0.692)         | -3.37 (0.626)     | -2.87 (0.850)       |                           |                                               |       |
| 40 <sup>th</sup> to 60 <sup>th</sup>                       | Control      | 10.62 (0.495)       | 9.48 (0.634)         | -1.14 (0.558)     |                     |                           | 0.60 (1.161), <i>n.s.</i>                     |       |
|                                                            | Intervention | 9.44 (0.531)        | 6.27 (0.743)         | -3.16 (0.675)     | -2.02 (0.867)       |                           |                                               |       |
| > 60 <sup>th</sup>                                         | Control      | 8.99 (0.543)        | 7.93 (0.677)         | -1.05 (0.595)     |                     |                           | 1.21 (1.195), <i>n.s.</i>                     |       |
|                                                            | Intervention | 9.65 (0.543)        | 7.20 (0.724)         | -2.46 (0.645)     | -1.40 (0.859)       |                           |                                               |       |
| > 80 <sup>th</sup>                                         | Control      | 8.82 (0.540)        | 7.01 (0.686)         | -1.80 (0.615)     |                     |                           | 1.74 (1.170), <i>n.s.</i>                     |       |
|                                                            | Intervention | 8.07 (0.516)        | 5.39 (0.666)         | -2.68 (0.587)     | -0.88 (0.827)       |                           |                                               |       |
| <b>Subjective employment forecast (SPE)</b>                |              |                     |                      |                   |                     |                           |                                               |       |
| Rated 1                                                    | Control      | 9.03 (0.477)        | 7.44 (0.607)         | -1.59 (0.525)     |                     |                           | 1.45                                          | 0.226 |
|                                                            | Intervention | 8.95 (0.498)        | 6.43 (0.659)         | -2.53 (0.579)     | -0.94 (0.771)       | Ref.                      |                                               |       |

## Predicting Effects of An Internet-based Depression Intervention for Patients with Chronic Back Pain

|         |              | PHQ-9 Score         |                      |                   |                     | Test of Moderation<br>(Change Score Analysis) |       |
|---------|--------------|---------------------|----------------------|-------------------|---------------------|-----------------------------------------------|-------|
|         |              | Baseline<br>(M, SE) | Post-Test<br>(M, SE) | Change<br>(M, SE) | Δ Change<br>(M, SE) | Diff. Δ Change<br>(M, SE)                     | F/t p |
| Rated 2 | Control      | 9.93 (0.591)        | 9.60 (0.751)         | -0.33 (0.644)     |                     |                                               |       |
|         | Intervention | 9.51 (0.498)        | 6.34 (0.637)         | -3.17 (0.541)     | -2.84 (0.832)       | -1.90 (1.128), <i>n.s.</i>                    |       |
| Rated 3 | Control      | 11.04 (0.416)       | 9.95 (0.528)         | -1.09 (0.467)     |                     |                                               |       |
|         | Intervention | 10.76 (0.431)       | 8.07 (0.587)         | -2.68 (0.508)     | -1.59 (0.715)       | -0.65 (1.019), <i>n.s.</i>                    |       |
| Rated 4 | Control      | 11.80 (0.480)       | 11.18 (0.624)        | -0.62 (0.539)     |                     |                                               |       |
|         | Intervention | 12.07 (0.497)       | 8.59 (0.690)         | -3.48 (0.611)     | -2.86 (0.828)       | -1.925 (1.134), <i>n.s.</i>                   |       |

### Pain-related disability (ODI), Percentiles

|                                      |              |               |               |               |               |                            |      |       |
|--------------------------------------|--------------|---------------|---------------|---------------|---------------|----------------------------|------|-------|
| < 20 <sup>th</sup>                   | Control      | 8.78 (0.472)  | 7.62 (0.605)  | -1.16 (0.543) |               |                            | 0.75 | 0.555 |
|                                      | Intervention | 8.05 (0.471)  | 5.09 (0.624)  | -2.96 (0.555) | -1.80 (0.754) | Ref.                       |      |       |
| < 40 <sup>th</sup>                   | Control      | 8.56 (0.549)  | 7.44 (0.710)  | -1.12 (0.636) |               |                            |      |       |
|                                      | Intervention | 9.41 (0.550)  | 6.42 (0.724)  | -2.99 (0.652) | -1.87 (0.916) | -0.07 (1.195), <i>n.s.</i> |      |       |
| 40 <sup>th</sup> to 60 <sup>th</sup> | Control      | 11.15 (0.480) | 10.01 (0.640) | -1.13 (0.574) |               |                            |      |       |
|                                      | Intervention | 10.16 (0.549) | 8.14 (0.757)  | -2.02 (0.692) | -0.89 (0.933) | 0.91 (1.184), <i>n.s.</i>  |      |       |
| > 60 <sup>th</sup>                   | Control      | 10.87 (0.514) | 10.56 (0.659) | -0.31 (0.583) |               |                            |      |       |
|                                      | Intervention | 10.81 (0.502) | 7.56 (0.703)  | -3.24 (0.639) | -2.93 (0.858) | -1.14 (1.119), <i>n.s.</i> |      |       |
| > 80 <sup>th</sup>                   | Control      | 13.45 (0.534) | 12.39 (0.727) | -1.07 (0.650) |               |                            |      |       |
|                                      | Intervention | 12.99 (0.481) | 9.68 (0.654)  | -3.31 (0.592) | -2.24 (0.872) | -0.44 (1.142), <i>n.s.</i> |      |       |

\* $p < 0.05$ , \*\* $p < 0.01$ , \*\*\* $p < 0.001$ .

Note: Change Score Analysis was based on a linear OLS regression with stratification terms for trial; see "OLS Regression Model" formula in S4. Change scores were used as the response, and percentile groups/categorical predictors were used as the moderator variable.

### S11. PHQ-9 symptom changes in baseline PHQ-9 percentile groups.

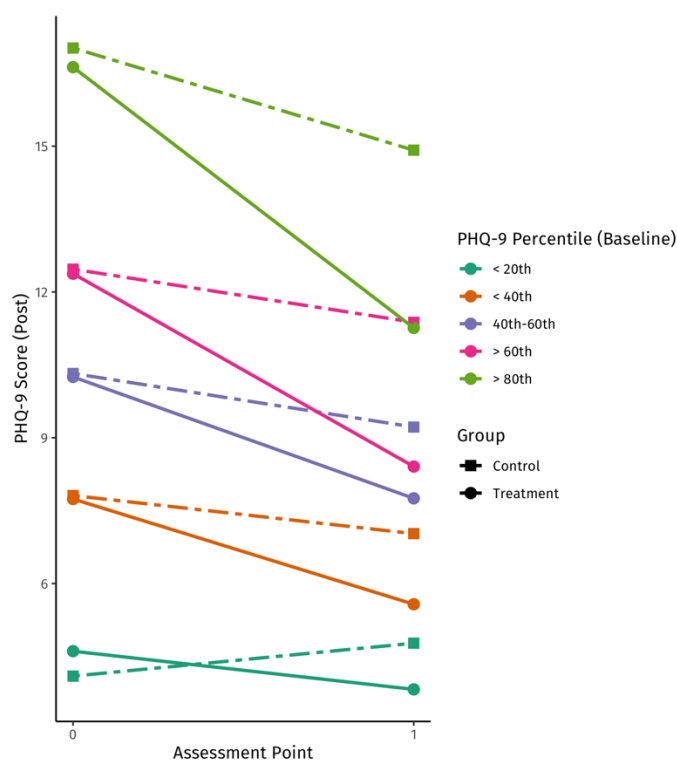

S12. Correlation matrix of moderator variables.

|                                | Sex              | Age              | Relationship Status | Children        | Education        | Previous Depression Medication | Previous Psychotherapy | Social Support   | Internet Affinity | Subjective Employment Forecast | Recruitment     | Sick Leave      | Previous Back Pain Medication | Lifetime SCID Diagnosis | Quality of Life | Depressive Symptoms (HAM-D-17) | Depressive Symptoms (PHQ-9) | Pain-related Disability | Pain Intensity  | Pain Self-Efficacy |
|--------------------------------|------------------|------------------|---------------------|-----------------|------------------|--------------------------------|------------------------|------------------|-------------------|--------------------------------|-----------------|-----------------|-------------------------------|-------------------------|-----------------|--------------------------------|-----------------------------|-------------------------|-----------------|--------------------|
| Sex                            | -0.01<br>(0.047) | 0.045            | 0.044               | 0.045           | 0.043            | 0.045                          | 0.044                  | 0.045            | 0.044             | 0.045                          | 0.045           | 0.05            | 0.045                         | 0.045                   | 0.045           | 0.045                          | 0.045                       | 0.045                   | 0.045           | 0.045              |
| Age                            | -0.03            | -0.04<br>(0.048) | 0.043               | 0.041           | 0.044            | 0.045                          | 0.045                  | 0.045            | 0.044             | 0.045                          | 0.045           | 0.056           | 0.044                         | 0.044                   | 0.045           | 0.044                          | 0.044                       | 0.045                   | 0.045           | 0.045              |
| Relationship Status            | -0.07            | 0.20             | 0.03<br>(0.047)     | 0.04            | 0.044            | 0.045                          | 0.045                  | 0.045            | 0.044             | 0.045                          | 0.045           | 0.051           | 0.045                         | 0.045                   | 0.045           | 0.045                          | 0.045                       | 0.045                   | 0.044           | 0.045              |
| Children                       | -0.01            | 0.29             | 0.31                | 0.04<br>(0.049) | 0.044            | 0.045                          | 0.044                  | 0.045            | 0.045             | 0.046                          | 0.044           | 0.047           | 0.045                         | 0.045                   | 0.045           | 0.045                          | 0.045                       | 0.045                   | 0.045           | 0.045              |
| Education                      | -0.19            | 0.08             | -0.08               | -0.13           | -0.13<br>(0.048) | 0.045                          | 0.045                  | 0.043            | 0.045             | 0.044                          | 0.044           | 0.046           | 0.044                         | 0.038                   | 0.041           | 0.042                          | 0.042                       | 0.044                   | 0.043           | 0.042              |
| Previous Depression Medication | -0.09            | 0.05             | 0.02                | 0.06            | -0.08            | 0.09<br>(0.05)                 | 0.036                  | 0.045            | 0.045             | 0.045                          | 0.045           | 0.051           | 0.045                         | 0.043                   | 0.043           | 0.044                          | 0.044                       | 0.045                   | 0.045           | 0.045              |
| Previous Psychotherapy         | -0.13            | 0.01             | 0.05                | 0.11            | -0.02            | 0.44                           | 0.11<br>(0.049)        | 0.045            | 0.045             | 0.045                          | 0.045           | 0.049           | 0.045                         | 0.043                   | 0.043           | 0.042                          | 0.042                       | 0.045                   | 0.045           | 0.045              |
| Social Support                 | -0.03            | -0.03            | -0.06               | -0.05           | 0.16             | -0.07                          | -0.03                  | -0.21<br>(0.045) | 0.044             | 0.044                          | 0.044           | 0.047           | 0.045                         | 0.044                   | 0.041           | 0.042                          | 0.041                       | 0.043                   | 0.044           | 0.043              |
| Internet Affinity              | 0.14             | -0.12            | -0.06               | -0.06           | 0.00             | 0.06                           | 0.04                   | -0.10            | 0.10<br>(0.048)   | 0.045                          | 0.045           | 0.048           | 0.045                         | 0.044                   | 0.044           | 0.044                          | 0.044                       | 0.044                   | 0.045           | 0.044              |
| Subjective Employment Forecast | 0.09             | 0.15             | 0.07                | 0.06            | -0.14            | 0.09                           | 0.00                   | -0.16            | 0.01              | 0.26<br>(0.044)                | 0.045           | 0.048           | 0.044                         | 0.044                   | 0.038           | 0.044                          | 0.041                       | 0.038                   | 0.041           | 0.038              |
| Recruitment                    | -0.06            | 0.05             | -0.03               | -0.12           | 0.09             | 0.07                           | 0.01                   | 0.06             | 0.06              | 0.06                           | 0.00<br>(0.048) | 0.049           | 0.045                         | 0.044                   | 0.044           | 0.044                          | 0.045                       | 0.045                   | 0.045           | 0.045              |
| Sick Leave                     | -0.01            | -0.07            | -0.02               | -0.08           | -0.10            | -0.02                          | 0.03                   | -0.08            | 0.07              | 0.15                           | -0.01           | 0.16<br>(0.051) | 0.048                         | 0.049                   | 0.049           | 0.048                          | 0.048                       | 0.049                   | 0.049           | 0.049              |
| Previous Back Pain Medication  | -0.05            | -0.08            | 0.00                | -0.04           | -0.08            | 0.03                           | -0.03                  | -0.03            | -0.01             | 0.13                           | -0.05           | 0.14            | 0.17<br>(0.047)               | 0.045                   | 0.042           | 0.044                          | 0.043                       | 0.039                   | 0.042           | 0.041              |
| Lifetime SCID Diagnosis        | 0.02             | -0.16            | 0.01                | 0.02            | -0.38            | 0.19                           | 0.22                   | -0.15            | 0.13              | 0.13                           | 0.09            | 0.11            | 0.05                          | 0.28<br>(0.046)         | 0.035           | 0.03                           | 0.033                       | 0.041                   | 0.044           | 0.04               |
| Quality of Life                | 0.03             | -0.06            | 0.05                | 0.06            | -0.28            | 0.19                           | 0.20                   | -0.30            | 0.15              | 0.40                           | 0.07            | 0.24            | 0.25                          | 0.46                    | 0.54<br>(0.035) | 0.03                           | 0.02                        | 0.022                   | 0.034           | 0.023              |
| Depressive Symptoms (HAM-D-17) | -0.03            | -0.09            | 0.02                | 0.02            | -0.25            | 0.17                           | 0.26                   | -0.23            | 0.09              | 0.19                           | 0.09            | 0.16            | 0.12                          | 0.58                    | 0.56            | 0.46<br>(0.04)                 | 0.026                       | 0.037                   | 0.042           | 0.038              |
| Depressive Symptoms (PHQ-9)    | -0.03            | -0.13            | 0.02                | 0.04            | -0.27            | 0.18                           | 0.26                   | -0.30            | 0.10              | 0.31                           | 0.07            | 0.20            | 0.21                          | 0.52                    | 0.74            | 0.66                           | 0.63<br>(0.029)             | 0.033                   | 0.039           | 0.035              |
| Pain-related Disability        | 0.02             | -0.02            | 0.04                | 0.01            | -0.14            | 0.05                           | 0.00                   | -0.18            | 0.10              | 0.40                           | 0.03            | 0.23            | 0.35                          | 0.29                    | 0.71            | 0.42                           | 0.52                        | 0.39<br>(0.041)         | 0.031           | 0.023              |
| Pain Intensity                 | 0.05             | 0.01             | 0.08                | 0.06            | -0.21            | 0.01                           | 0.03                   | -0.08            | -0.02             | 0.31                           | 0.02            | 0.18            | 0.28                          | 0.16                    | 0.49            | 0.26                           | 0.36                        | 0.56                    | 0.26<br>(0.046) | 0.034              |
| Pain Self-Efficacy             | -0.03            | 0.03             | -0.01               | 0               | 0.23             | -0.11                          | -0.08                  | 0.22             | -0.09             | -0.40                          | -0.05           | -0.20           | -0.30                         | -0.33                   | -0.69           | -0.40                          | -0.48                       | -0.70                   | -0.50           | -0.39<br>(0.04)    |

Note. The lower triangle shows the correlation between moderator variables, and the upper triangle the corresponding standard errors. The diagonal elements show the correlation of the moderator variable with the target outcome (PHQ-9 at post-test), with the standard error in brackets.

**S13. Variable permutation importance (model-based random forest).**

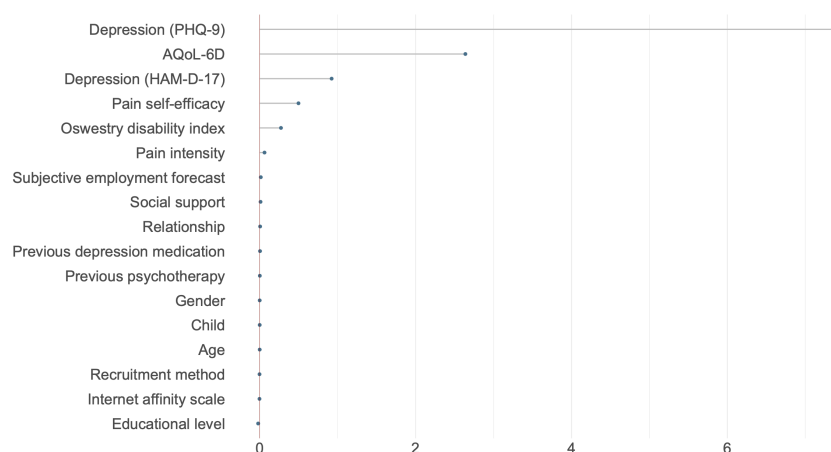

**S14. Variable importances (complete cases only).**

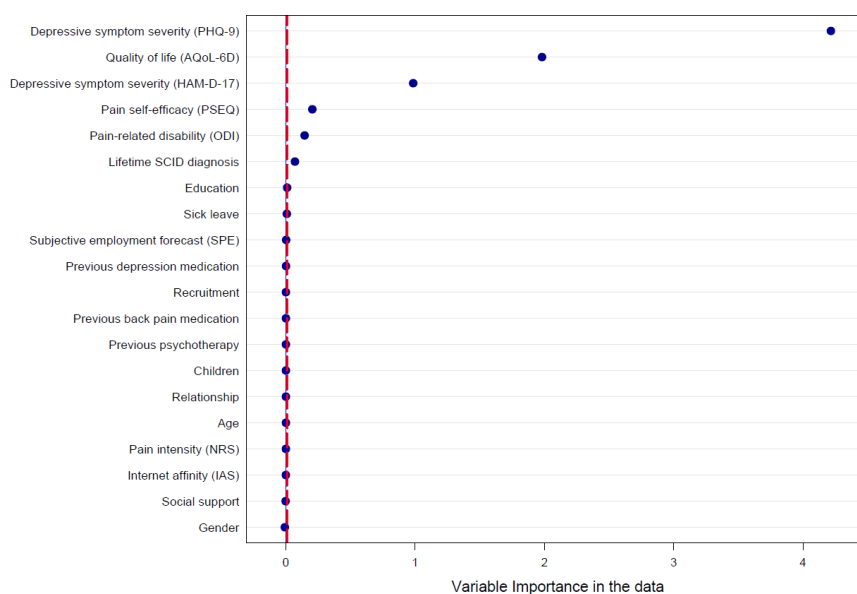

Note: Pain Intensity (NRS), Internet Affinity (IAS), Social Support and Gender had negative variable importance scores.

**S15. Model-based recursive partitioning (complete cases only; n=382).**

| Node                          | Cohen's <i>d</i> (95% CI) | S.E.  | <i>n</i> | <i>m</i> <sub>G</sub> | <i>n</i> <sub>CG</sub> |
|-------------------------------|---------------------------|-------|----------|-----------------------|------------------------|
| PHQ-9 ≤ 6                     | -0.383 [-0.837; 0.072]    | 0.232 | 77       | 40                    | 37                     |
| 6 < PHQ-9 ≤ 10 & AQoL-6D ≤ 43 | -0.501 [-1.151; 0.150]    | 0.332 | 39       | 18                    | 21                     |
| 6 < PHQ-9 ≤ 10 & AQoL-6D > 43 | -0.504 [-0.903; -0.105]   | 0.204 | 99       | 51                    | 48                     |
| 10 < PHQ-9 ≤ 15 & PSEQ ≤ 38   | -1.278 [-1.726; -0.839]   | 0.229 | 79       | 39                    | 40                     |
| 10 < PHQ-9 ≤ 15 & PSEQ > 38   | 0.218 [-0.495; 0.931]     | 0.364 | 37       | 12                    | 25                     |
| PHQ-9 > 15                    | -0.478 [-1.041; 0.086]    | 0.288 | 51       | 24                    | 27                     |

**S16. Reliable change in terminal tree nodes.**

| Node                                      | RCI           | Control      |              |              | Intervention |              |              | $\chi^2$ Test <sup>a</sup>            |
|-------------------------------------------|---------------|--------------|--------------|--------------|--------------|--------------|--------------|---------------------------------------|
|                                           |               | Deteriorated | Unchanged    | Improved     | Deteriorated | Unchanged    | Improved     |                                       |
| PHQ-9 ≤ 6                                 | <i>n</i><br>% | 19<br>38%    | 22<br>44%    | 9<br>18%     | 9<br>16.36%  | 29<br>52.73% | 17<br>30.91% | $F_{1,1085.2}=1.062$<br>$p=0.303$     |
| PHQ-9 ≤ 10,<br>PHQ-9 > 6,<br>AQOL-6D ≤ 43 | <i>n</i><br>% | 2<br>9.09%   | 8<br>36.36%  | 12<br>54.55% | 2<br>7.41%   | 3<br>11.11%  | 22<br>81.48% | $F_{1,1837.66}=2.390$<br>$p=0.122$    |
| PHQ-9 ≤ 10,<br>PHQ-9 > 6,<br>AQOL-6D > 43 | <i>n</i><br>% | 18<br>30%    | 18<br>30%    | 24<br>40%    | 9<br>14.52%  | 18<br>29.03% | 35<br>56.45% | $F_{1,2340.4}=2.163$<br>$p=0.141$     |
| PHQ-9 ≤ 15,<br>PHQ-9 > 10,<br>PSEQ ≤ 38   | <i>n</i><br>% | 16<br>31.37% | 17<br>33.33% | 18<br>35.29% | 3<br>5%      | 12<br>20%    | 45<br>75%    | $F_{1,681.39}=11.729$<br>$p<0.001$    |
| PHQ-9 ≤ 15,<br>PHQ-9 > 10,<br>PSEQ > 38   | <i>n</i><br>% | 3<br>11.54%  | 6<br>23.08%  | 17<br>65.38% | 3<br>17.65%  | 4<br>23.53%  | 10<br>58.82% | $F_{1,47174.22}=0.006$ ,<br>$p=0.936$ |
| PHQ-9 > 15                                | <i>n</i><br>% | 3<br>8.57%   | 13<br>37.14% | 19<br>54.29% | 1<br>3.45%   | 7<br>24.14%  | 21<br>72.41% | $F_{1,2130.7}=1.194$<br>$p=0.274$     |

<sup>a</sup>Test for differences in reliable improvement between groups

**S17. Non-zero parameters of the linear mixed model with  $\ell_1$ -estimation (glmLasso).**

**Prognostic Predictors**

|         | Intercept | Group  | PHQ-9 | AQOL-6D | HAM-D-17 | PSEQ   | ODI    |
|---------|-----------|--------|-------|---------|----------|--------|--------|
| $\beta$ | 4.731***  | -0.393 | 0.558 | 0.065   | 0.083    | -0.053 | -0.006 |

**Prescriptive Predictor**

|         | PSEQ     | Education <sup>a</sup> |
|---------|----------|------------------------|
| $\beta$ | 0.036*** | 1.291                  |

**Variance component**

|        | Intercept | Slope |
|--------|-----------|-------|
| $\tau$ | 0.285     | 0.095 |

Note. Values represent unstandardized regression weights. Penalty parameter  $\lambda=670$  determined based on the BIC.  
<sup>a</sup>up to high school only, yes  
 \*\*\* $p<0.001$
